# Supplementary material
Source: publisher figshare collection journal article supplement (https://acs.figshare.com/ndownloader/files/4179232)

## Supporting Information

### Morphology and Optical Response of Carbon Nanotubes Functionalized by Conjugated Polymers

Al'ona Furmanchuk<sup>†§</sup>, Jerzy Leszczynski<sup>§</sup>, Sergei Tretiak<sup>†</sup>, Svetlana V. Kilina<sup>†\*</sup>

<sup>†</sup>*Theoretical Division and Center for Integrated Nanotechnology,  
Los Alamos National Laboratory, Los Alamos, NM 87545*

<sup>§</sup>*Department of Chemistry and Biochemistry,  
Jackson State University, Jackson, MS 39217*

<sup>‡</sup>*Department of Chemistry and Biochemistry,  
North Dakota State University, Fargo, ND 58108*

*\*corresponding author  
e-mail: svetlana.kilina@nds.edu*

**Table S1.** Average values of structural parameters (all units are Å) of isolated linear PPV oligomer compared with PPV oligomers in PPV/SWCNT hybrids. SWNT-PPV binding energy (E/unit) and energy per unit of PPV required for an oligomer bending<sup>†</sup> (E<sub>bend</sub>/unit), both in eV. Data based on MM3 force field optimization.

| structure                           | wrapping angle (°) | 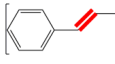 |  |  |  | BLA <sup>*</sup> | PPV-SWCNT distance | E/unit (eV) | E <sub>bend</sub> /unit <sup>†</sup> (eV) |
|-------------------------------------|--------------------|-----------------------------------------------------------------------------------|-----------------------------------------------------------------------------------|-----------------------------------------------------------------------------------|-----------------------------------------------------------------------------------|------------------|--------------------|-------------|-------------------------------------------|
| <b>Isolated linear PPV oligomer</b> |                    |                                                                                   |                                                                                   |                                                                                   |                                                                                   |                  |                    |             |                                           |
| <b>17 units</b>                     | -                  | 1.3444                                                                            | 1.4515                                                                            | 1.4515                                                                            | 1.3999                                                                            | 0.1072           | -                  | -           | -                                         |
| <b>PPV/(6,5) SWCNT composites</b>   |                    |                                                                                   |                                                                                   |                                                                                   |                                                                                   |                  |                    |             |                                           |
| <b>A9</b>                           | 0.98               | 1.3443                                                                            | 1.4516                                                                            | 1.4514                                                                            | 1.3997                                                                            | 0.1072           | 3.33               | -0.38       |                                           |
| <b>A8</b>                           | 5.25               | 1.3442                                                                            | 1.4518                                                                            | 1.4510                                                                            | 1.3998                                                                            | 0.1072           | 3.34               | -0.36       | 0.02                                      |
| <b>A7</b>                           | 19.91              | 1.3485                                                                            | 1.4595                                                                            | 1.4594                                                                            | 1.4027                                                                            | 0.1109           | 3.31               | -0.32       | 0.05                                      |
| <b>A6</b>                           | 27.93              | 1.3436                                                                            | 1.4497                                                                            | 1.4502                                                                            | 1.3993                                                                            | 0.1063           | 3.43               | -0.29       | 0.08                                      |
| <b>A5</b>                           | 42.82              | 1.3465                                                                            | 1.4546                                                                            | 1.4550                                                                            | 1.4012                                                                            | 0.1083           | 3.27               | -0.15       | 0.23                                      |
| <b>A4</b>                           | 48.77              | 1.3437                                                                            | 1.4504                                                                            | 1.4498                                                                            | 1.3994                                                                            | 0.1064           | 3.46               | -0.13       | 0.23                                      |
| <b>A3</b>                           | 56.03              | 1.3440                                                                            | 1.4501                                                                            | 1.4502                                                                            | 1.3994                                                                            | 0.1061           | 3.40               | -0.07       | 0.31                                      |
| <b>A2</b>                           | 70.28              | 1.3431                                                                            | 1.4483                                                                            | 1.4482                                                                            | 1.3985                                                                            | 0.1051           | 3.53               | 0.16        | 0.39                                      |
| <b>A1</b>                           | 75.83              | 1.3438                                                                            | 1.4503                                                                            | 1.4503                                                                            | 1.3990                                                                            | 0.1065           | 3.54               | -0.02       | 0.34                                      |
| <b>PPV/(8,0) SWCNT composites</b>   |                    |                                                                                   |                                                                                   |                                                                                   |                                                                                   |                  |                    |             |                                           |
| <b>B8</b>                           | 0.20               | 1.3444                                                                            | 1.4517                                                                            | 1.4517                                                                            | 1.3998                                                                            | 0.1072           | 3.32               | -0.36       |                                           |
| <b>B7</b>                           | 7.23               | 1.3438                                                                            | 1.4502                                                                            | 1.4512                                                                            | 1.3996                                                                            | 0.1069           | 3.33               | -0.35       | 0.02                                      |
| <b>B6</b>                           | 9.98               | 1.3443                                                                            | 1.4515                                                                            | 1.4515                                                                            | 1.3997                                                                            | 0.1072           | 3.33               | -0.35       |                                           |
| <b>B5</b>                           | 11.24              | 1.3439                                                                            | 1.4505                                                                            | 1.4509                                                                            | 1.3995                                                                            | 0.1068           | 3.26               | -0.34       | 0.02                                      |
| <b>B4</b>                           | 19.66              | 1.3480                                                                            | 1.4584                                                                            | 1.4585                                                                            | 1.4023                                                                            | 0.1105           | 3.29               | -0.31       | 0.06                                      |
| <b>B3</b>                           | 34.37              | 1.3422                                                                            | 1.4471                                                                            | 1.4469                                                                            | 1.3981                                                                            | 0.1048           | 3.40               | -0.20       | 0.16                                      |
| <b>B2</b>                           | 58.60              | 1.3458                                                                            | 1.4532                                                                            | 1.4533                                                                            | 1.4003                                                                            | 0.1075           | 3.28               | 0.02        | 0.38                                      |
| <b>B1</b>                           | 72.77              | 1.3442                                                                            | 1.4508                                                                            | 1.4504                                                                            | 1.3991                                                                            | 0.1064           | 3.61               | 0.10        | 0.43                                      |

\*BLA stands for bond length alternation. It is defined as difference between average value of single bonds and double bond length in carbon-carbon chains connected benzene rings of PPV oligomers.

<sup>†</sup>Energy difference was found between the coiled oligomer and the same length linear fully optimized PPV.

Natural Transition Orbitals (NTOs) analysis of four lowest excited states of differently coiled PPV oligomers has been done in order to check effect of coiling angle. The coiling angles in isolated oligomers chosen in correspondence with wrapping angles observed in PPV/SWNT hybrids. The same length linear oligomers have also been generated for every coiled one (see Table S2, S3). This way, shape and position of electron and hole orbitals will be independent of conjugation length.

Oligomers similar to A2- and B2-like hybrid structures were chosen, since their spectra revealed significant shift and broadening in the first absorption bands comparing to linear PPV analogs. Degeneracy of NTOs is detected for these oligomers. Therefore, two dominant pairs of NTOs were always used to characterize the first four single-particle transitions. All NTOs of isolated coiled oligomers revealed  $\pi - \pi^*$  character of excitations that is also typical for the linear oligomers. It is interesting to see that localization of transition orbitals of the first state in A2-like and B2-like oligomers is always similar to corresponding orbitals of the linear oligomer. Therefore, coiling results only in change of intensity of corresponding peaks in Figure 4. States  $S_2$  and  $S_3$  in A2-like oligomer represented by change in localization of orbitals. In state  $S_2$  electron and hole in both  $\text{HOTO} \rightarrow \text{LUTO}$  and  $\text{HOTO} -1 \rightarrow \text{LUTO} +1$  excitations are losing half portion of orbitals comparing with corresponding orbitals of linear oligomer. In state  $S_3$  only  $\text{HOTO} -1 \rightarrow \text{LUTO} +1$  excitation reduced by half, while central symmetry is lost for  $\text{HOTO} \rightarrow \text{LUTO}$  excitation. The  $S_4$  state is slightly similar to  $S_2$  except remained part of the orbital is significantly shifted to the very end of coiled oligomer. Therefore, we may conclude that change of the NTOs' symmetry results in increase of oscillator strength of corresponding transition band. Except for state  $S_2$ , The first four states keeps distribution of orbitals similar to linear oligomers. The  $\text{HOTO} \rightarrow \text{LUTO}$  excitation of  $S_2$  state are reflected in significant reduction of electron delocalization and change of symmetry for the hole orbital.

**Table S2.** The electron and hole NTOs for the four lowest excited states in isolated A2-like coiled PPV oligomer and linear one of the same length. The overall length of each oligomer is 17 units. The population of each orbital is given above its picture. Position (eV) and intensity (arb.u.) of each excitation is listed.

| A2-like coiled oligomer                                                             |              | Linear oligomer                                                                      |  |
|-------------------------------------------------------------------------------------|--------------|--------------------------------------------------------------------------------------|--|
| S <sub>1</sub> :                                                                    | 2.6 eV (0.8) | 2.8 eV (11.7)                                                                        |  |
| hole                                                                                |              |                                                                                      |  |
|                                                                                     | 21.56%       | 21.36%                                                                               |  |
| 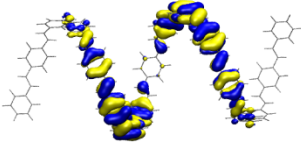   |              |    |  |
|                                                                                     | 33.10%       | 31.83%                                                                               |  |
|    |              |    |  |
| electron                                                                            |              |                                                                                      |  |
|                                                                                     | 33.10%       | 31.83%                                                                               |  |
|   |              |    |  |
|                                                                                     | 21.56%       | 21.36%                                                                               |  |
|  |              |  |  |
| S <sub>2</sub> :                                                                    | 2.7 eV (0.1) | 2.9 eV (0.0)                                                                         |  |
| hole                                                                                |              |                                                                                      |  |
|                                                                                     | 27.26%       | 27.23%                                                                               |  |
|  |              |  |  |
|                                                                                     | 27.56%       | 27.25%                                                                               |  |
|  |              |  |  |
| electron                                                                            |              |                                                                                      |  |
|                                                                                     | 27.56%       | 27.25%                                                                               |  |
|  |              |  |  |
|                                                                                     | 27.26%       | 27.23%                                                                               |  |

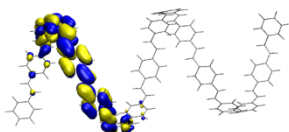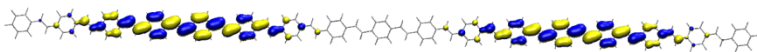

S<sub>3</sub>: 2.8 eV (0.2)  
hole

3.0 eV (1.1)

23.58%

22.62%

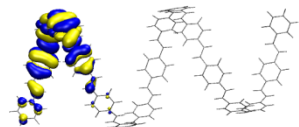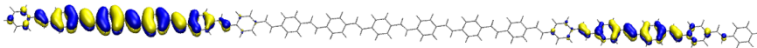

23.84%

24.08%

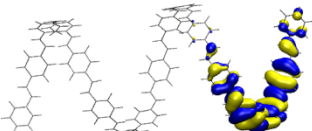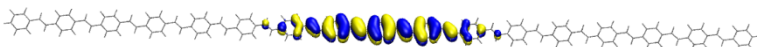

electron

23.84%

24.08%

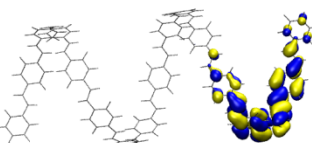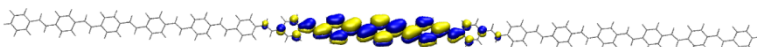

23.58%

22.62%

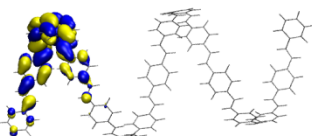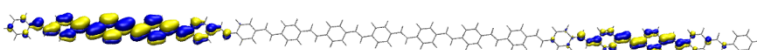

S<sub>4</sub>: 3.0 eV (3.6)  
hole

3.1 eV (0.0)

21.94%

20.32%

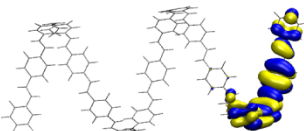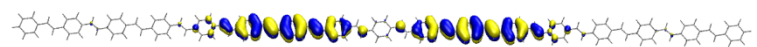

22.06%

20.69%

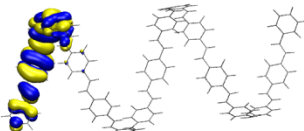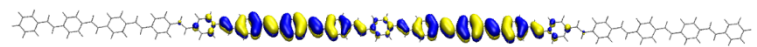

electron

22.06%

20.69%

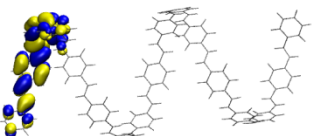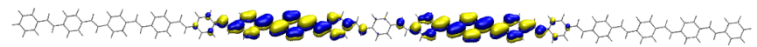

21.94%

20.32%

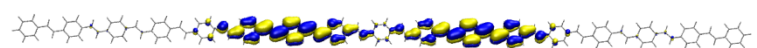

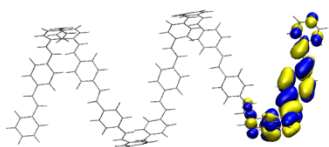

**Table S3.** The electron and hole NTOs for the four lowest excited states in isolated B2-like coiled PPV oligomer and linear one of the same length. The overall length of each oligomer is 9 units. The population of each orbital is given above its picture. Position (eV) and intensity (arb.u.) of each excitation is listed.

| B2-like coiled oligomer |                                                                                     | Linear oligomer                                                                      |  |
|-------------------------|-------------------------------------------------------------------------------------|--------------------------------------------------------------------------------------|--|
| S <sub>1</sub> :        | 2.8 eV (1.3)                                                                        | 2.8 eV (6.1)                                                                         |  |
| hole                    |                                                                                     |                                                                                      |  |
|                         | 24.11%                                                                              | 24.12%                                                                               |  |
|                         | 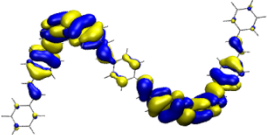   |    |  |
|                         | 51.95%                                                                              | 52.07%                                                                               |  |
|                         |    |    |  |
| electron                |                                                                                     |                                                                                      |  |
|                         | 51.95%                                                                              | 52.07%                                                                               |  |
|                         |  |  |  |
|                         | 24.11%                                                                              | 24.12%                                                                               |  |
|                         |  |  |  |
| S <sub>2</sub> :        | 3.0 eV (1.8)                                                                        | 3.1 eV (0.0)                                                                         |  |
| hole                    |                                                                                     |                                                                                      |  |
|                         | 37.47%                                                                              | 38.42%                                                                               |  |
|                         |  |  |  |
|                         | 39.89%                                                                              | 39.02%                                                                               |  |
|                         |  |  |  |
| electron                |                                                                                     |                                                                                      |  |
|                         | 39.89%                                                                              | 39.02%                                                                               |  |

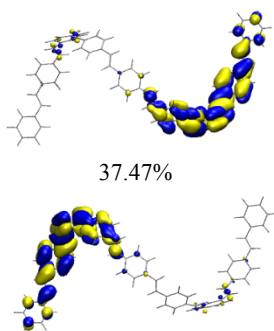

37.47%

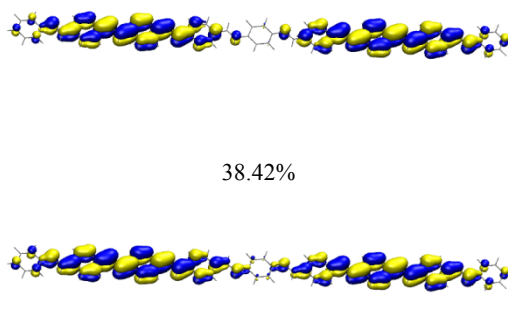

38.42%

S<sub>3</sub>: 3.3 eV (2.8)  
hole

3.3 eV (0.5)

28.62%

28.65%

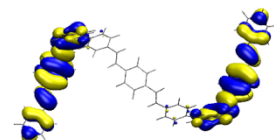

32.00%

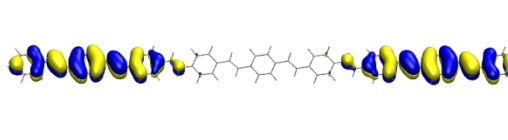

31.87%

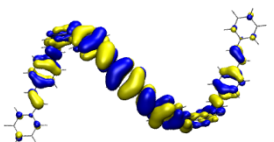

32.00%

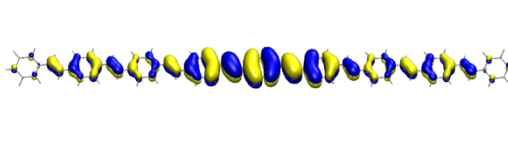

31.87%

electron

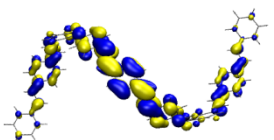

28.62%

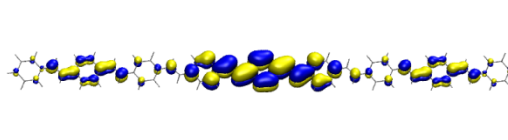

28.65%

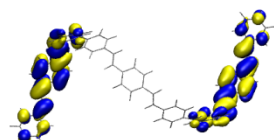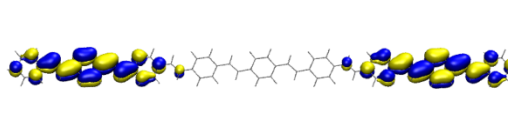

S<sub>4</sub>: 3.5 eV (0.3)  
hole

3.6 eV (0.0)

24.60%

24.43%

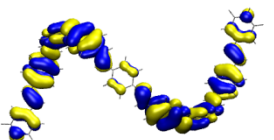

27.25%

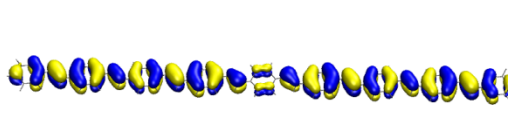

26.39%

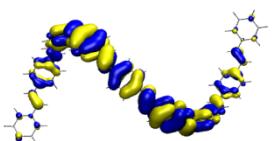

27.25%

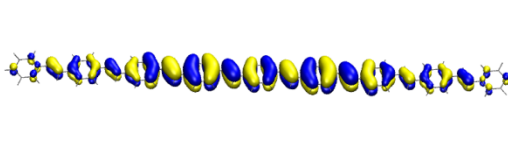

26.39%

electron

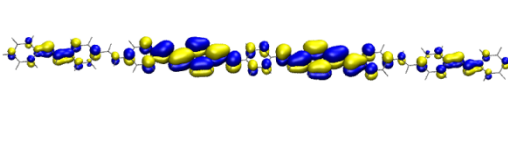

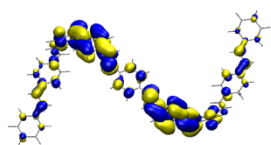

24.60%

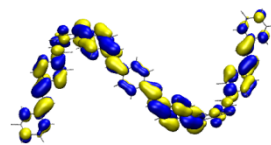

24.43%

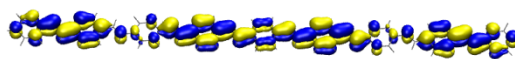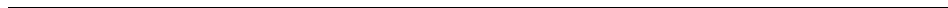

Supplement: Supplementary file 1 [file 4179232]
